# Supplementary material for: Impaired Mitochondrial Morphology and Functionality in Lonp1wt/− Mice
Source: PubMed Central journal article supplement (PMC7355737; doi:10.3390/jcm9061783), 2020-06-08
Supplement: jcm-09-01783-s001.pdf [file jcm-09-01783-s001.pdf]

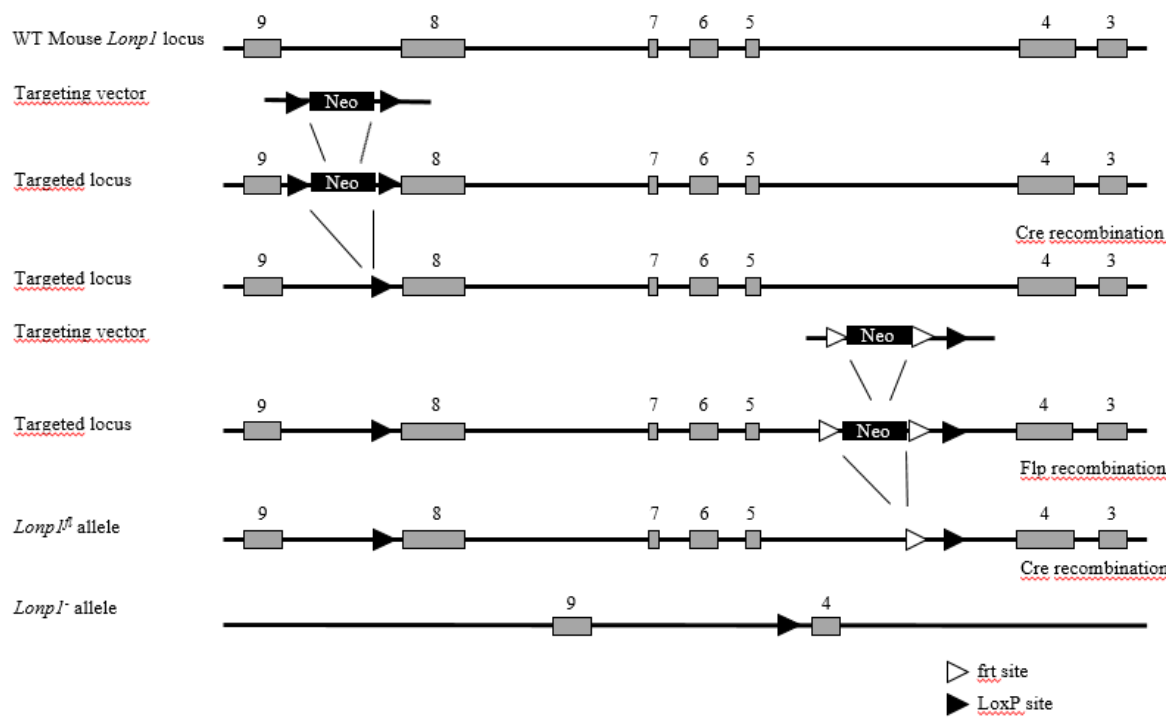

**Figure 1.** Representation of wild-type and mutant *Lonp1* alleles, and the targeting vector. Grey boxes indicate exons and lines introns.

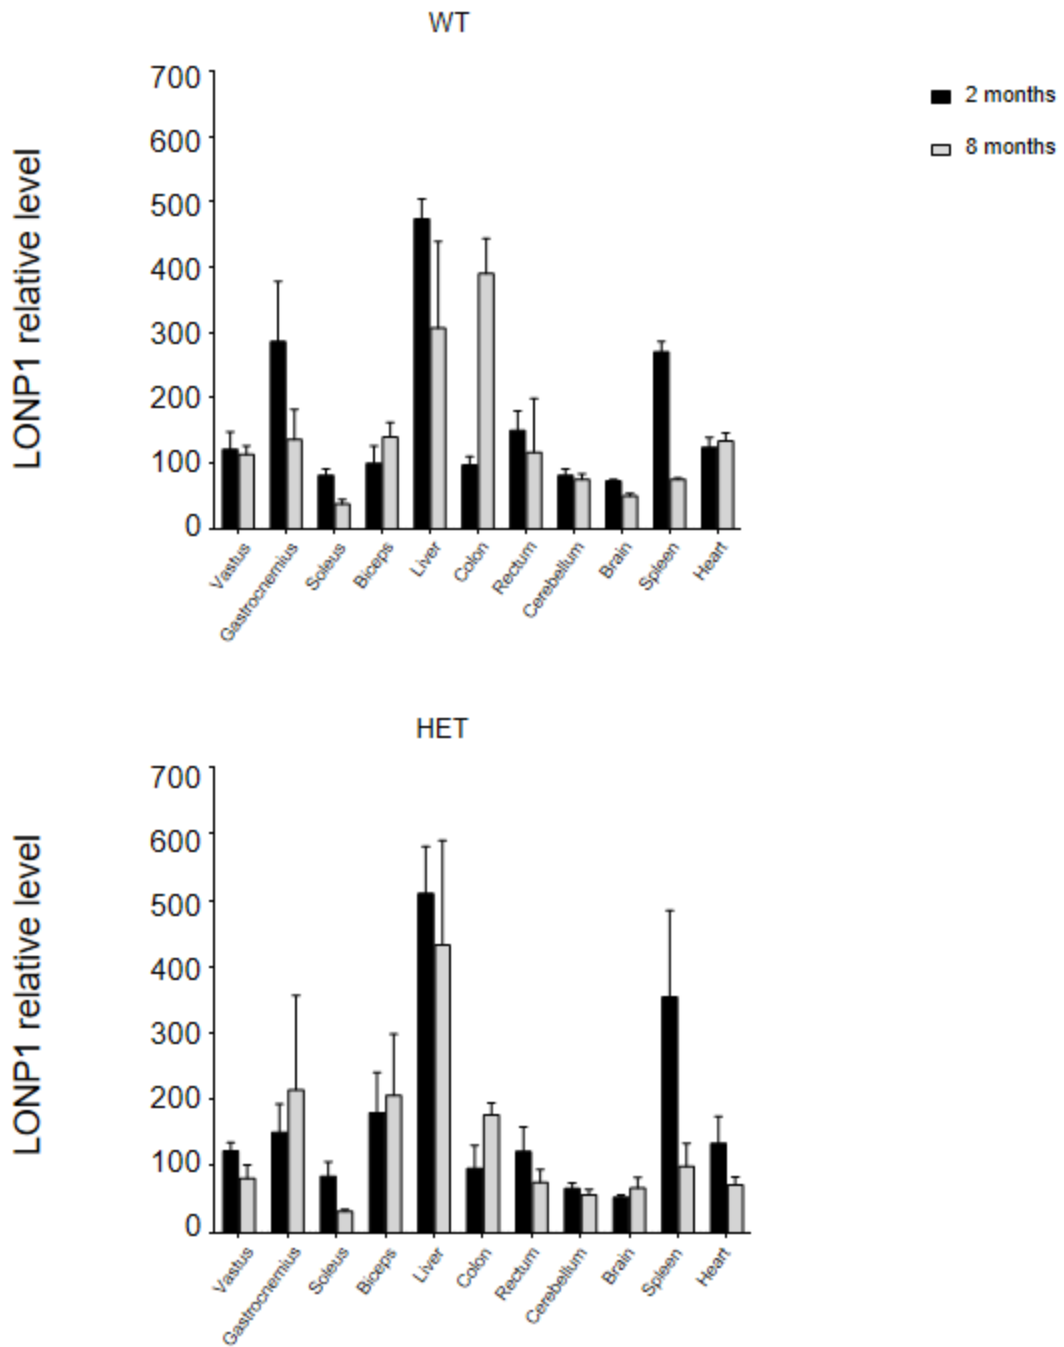

**Figure 2.** Comparison of the expression of LONP1 protein expression in different tissues at 2 and 8 months of age.

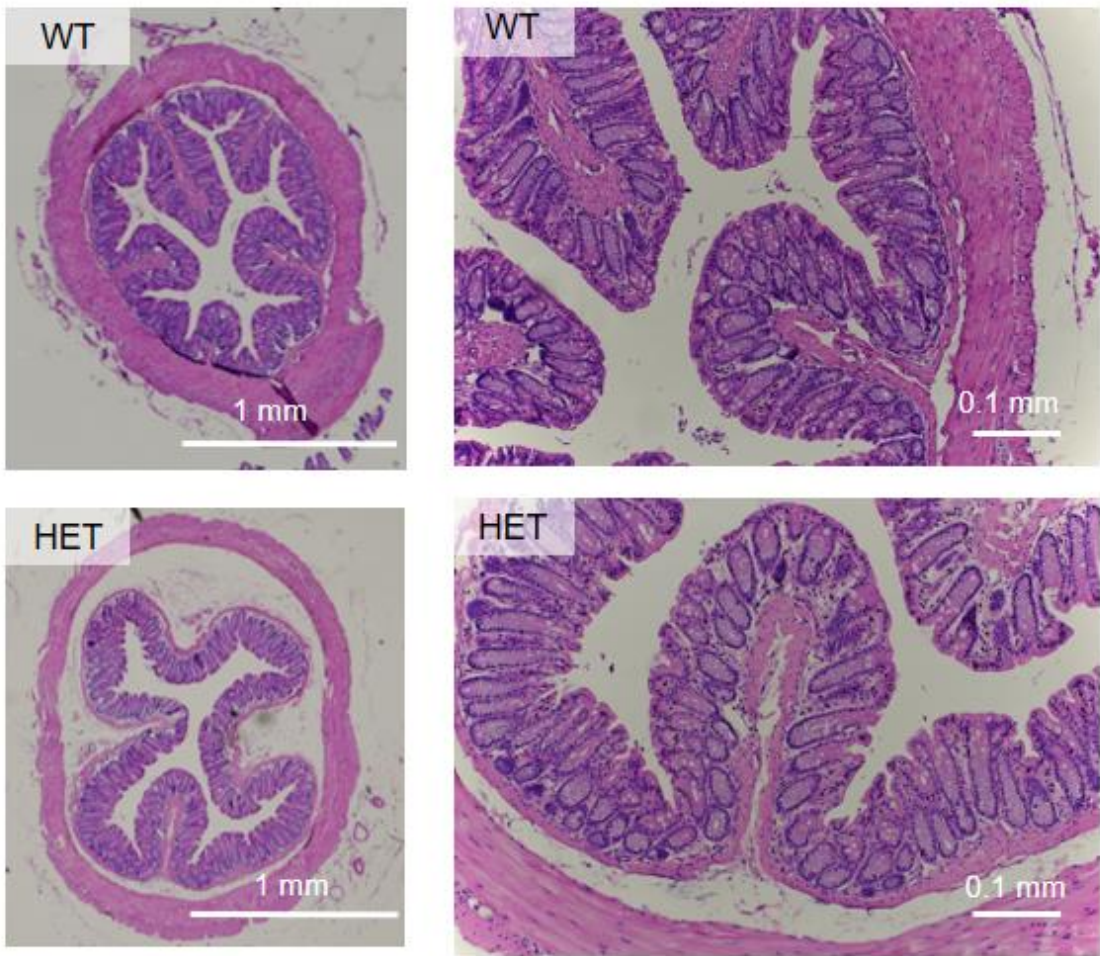

Figure 3. Hematoxylin and eosin staining of the colon of wt and heterozygous mice.

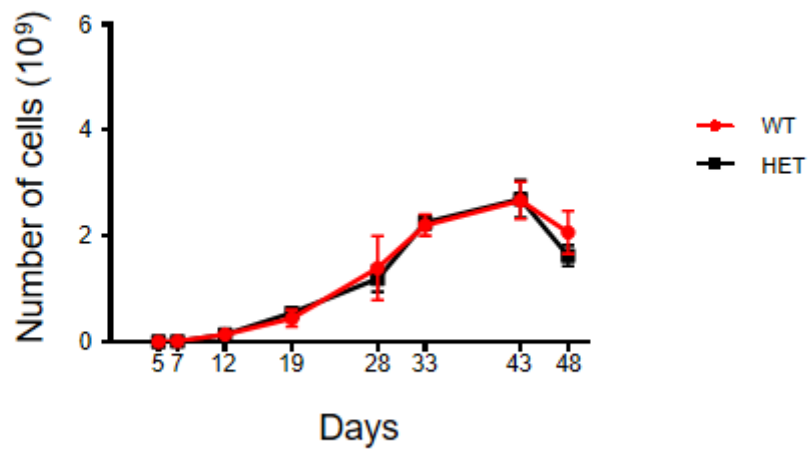

Figure 4. Cell growth curves of wt (circle) and het (square) MEFs.

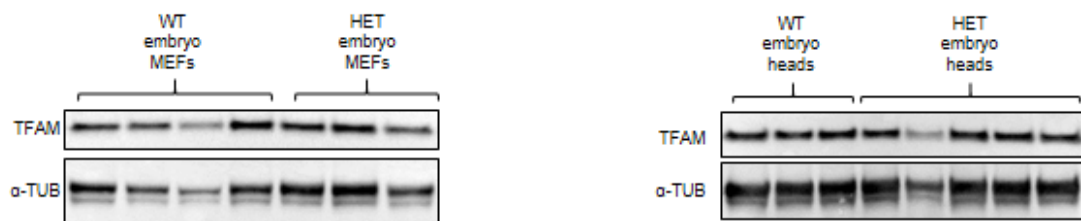

**Figure 5.** TFAM expression in MEFs as revealed by western blot.

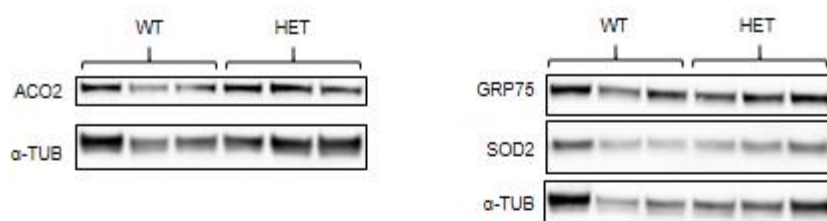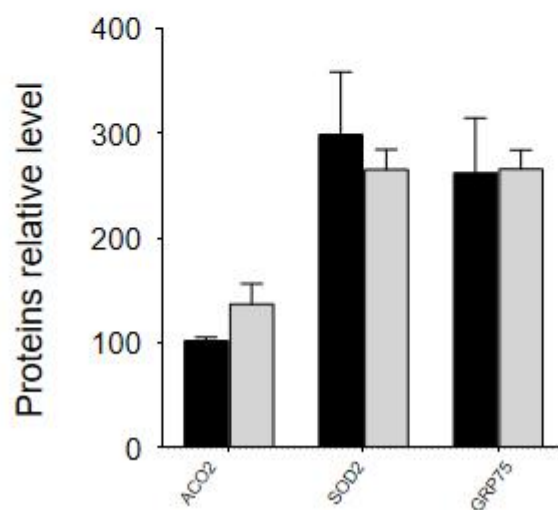

**Figure 6.** Analysis of the relative protein expression of ACO2, SOD2 and GRP75 in MEFs from wt and het mice as revealed by western blot.
